# Supplementary material for: Development point-of-care based lateral flow biosensor for the rapid detection of exosomes of subarachnoid hemorrhage patients
Source: Royal Society of Chemistry journal article supplement (doi:10.1039/d4tc02620a), 2024-01-01
Supplement: d4tc02620a1.pdf [file d4tc02620a1.pdf]

## ***Supporting Information***

### **Development point-of-care based lateral flow biosensor for the rapid detection of exosomes of subarachnoid hemorrhage patients**

*Mengyue Wang<sup>1,2#</sup>, Yanjiao Wang<sup>4#</sup>, Chengcheng Wang<sup>2</sup>, Qingbin Ni<sup>5</sup>, Jingyi Sun<sup>3</sup>,  
Baoliang Sun<sup>2\*</sup>, Ying Wang<sup>2\*</sup>*

*<sup>1</sup> School of Traditional Chinese Medicine, Shandong University of Traditional Chinese Medicine, Jinan, Shandong, 250355, China*

*<sup>2</sup> The Second Affiliated Hospital; Shandong First Medical University & Shandong Academy of Medical Sciences, Taian, Shandong, 271000, China*

*<sup>3</sup> Shandong Provincial Hospital Affiliated to Shandong First Medical University, Jinan, Shandong, 250021, China*

*<sup>4</sup> School of radiology; Shandong First Medical University & Shandong Academy of Medical Sciences, Taian, Shandong, 271000, China*

*<sup>5</sup> Postdoctoral Workstation, Taian Central Hospital, Taian, Shandong, 271000, China*

**Table S1. Typical techniques for exosomes detection**

| Detection methods            | Disease                      | Target protein | LOD                                  | Ref.      |
|------------------------------|------------------------------|----------------|--------------------------------------|-----------|
| Colorimetry                  | Breast cancer                | CD63           | $5.2 \times 10^5$ particles/ $\mu$ L | 1         |
| Nanoplasmonics               | Lung cancer                  | EGFR           | $9.72 \times 10^9$ exosomes/mL       | 2         |
| LFIA                         | The human melanoma cell line | MICA、CD63      | $5 \times 10^{10}$ exosomes/mL       | 3         |
| Fuorescence                  | ovarian cancer               | EpCAM          | $7.5 \times 10^5$ particles/mL       | 4         |
| SPR                          | Lung cancer                  | EGFR           | $2 \times 10^{10}$ exosomes/mL       | 5         |
| Electrochemical              | HepG2 cell                   | CD63           | $1 \times 10^6$ particles/mL         | 6         |
| Electrochemical impedimetric | HEK293 cells                 | CD81           | $1.9 \times 10^5$ particles/mL       | 7         |
| SERS                         | SAH                          | CD9、CD81       | $0.7 \times 10^4$ particles/mL       | This work |

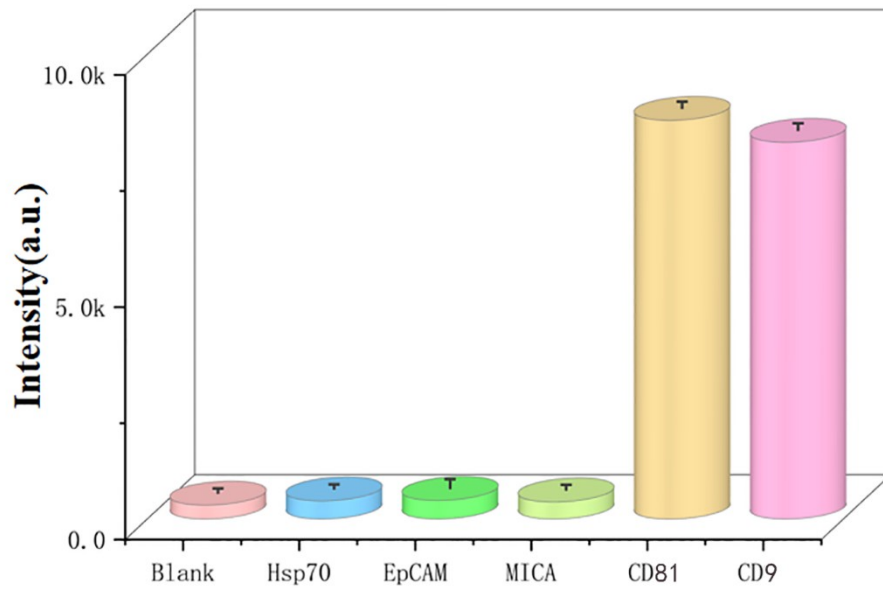

Fig.S1. Raman intensity of different types of exosome samples were detected by SERS probe at  $1090\text{ cm}^{-1}$ .

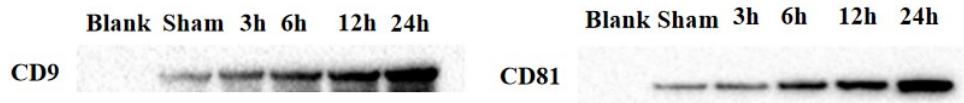

Fig.S2. Western blot analysis of isolated exosomes in the sham and SAH groups at different time points.

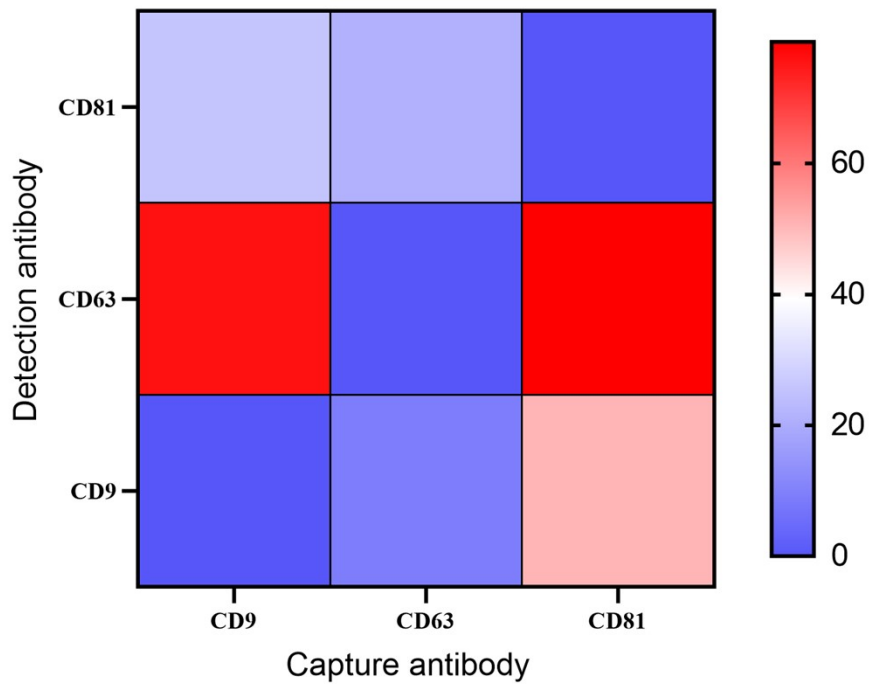

Fig.S3. Different combinations of capture and detection antibodies for LFA.

[1]Xia, Yaokun et al. "A visible and colorimetric aptasensor based on DNA-capped single-walled carbon nanotubes for detection of exosomes." *Biosensors & bioelectronics* vol. 92 (2017): 8-15. doi:10.1016/j.bios.2017.01.063

[2]Zeng, Xie et al. "Plasmonic Interferometer Array Biochip as a New Mobile Medical Device for Cancer Detection." *IEEE journal of selected topics in quantum electronics : a publication of the IEEE Lasers and Electro-optics Society* vol. 25,1 (2019): 7201707. doi:10.1109/JSTQE.2018.2865418

[3]López-Cobo, Sheila et al. "Immunoassays for scarce tumour-antigens in exosomes: detection of the human NKG2D-Ligand, MICA, in tetraspanin-containing nanovesicles from melanoma." *Journal of nanobiotechnology* vol. 16,1 47. 2 May. 2018, doi:10.1186/s12951-018-0372-z

[4]Zhao, Zheng et al. "A microfluidic ExoSearch chip for multiplexed exosome detection towards blood-based ovarian cancer diagnosis." *Lab on a chip* vol. 16,3 (2016): 489-96. doi:10.1039/c5lc01117e

[5]Liu, Chang et al. "Sensitive Detection of Exosomal Proteins via a Compact Surface Plasmon Resonance Biosensor for Cancer Diagnosis." *ACS sensors* vol. 3,8 (2018): 1471-1479. doi:10.1021/acssensors.8b00230

[6]Zhou, Qing et al. "Development of an aptasensor for electrochemical detection of exosomes." *Methods (San Diego, Calif.)* vol. 97 (2016): 88-93. doi:10.1016/j.ymeth.2015.10.012

[7]Li, Qian et al. "Concentration-Normalized Electroanalytical Assaying of Exosomal Markers." *Analytical chemistry* vol. 89,5 (2017): 3184-3190. doi:10.1021/acs.analchem.6b05037
